# Supplementary material
Source: PubMed Central journal article supplement (PMC6088162)
Supplement: JB.00188-18_zjb999094839s1.pdf [file JB.00188-18_zjb999094839s1.pdf]

## Supplementary Materials

### Combined Drug-Resistance Mutations Substantially Enhance

### Enzyme Production in *Paenibacillus agaridevorans*

Kazumi Funane<sup>a,b\*</sup>, Yukinori Tanaka<sup>c\*</sup>, Takeshi Hosaka<sup>d</sup>, Kiriko Murakami<sup>e</sup>,  
Takatsugu Miyazaki<sup>b,f</sup>, Yuh Shiwa<sup>g</sup>, Shigehachi Gibu<sup>h</sup>, Takeshi Inaoka<sup>b</sup>, Ken  
Kasahara<sup>e</sup>, Nobuyuki Fujita<sup>g</sup>, Hirofumi Yoshikawa<sup>g</sup>, Yoshikazu Hiraga<sup>c</sup>, and  
Kozo Ochi<sup>c</sup>

Faculty of Life and Environmental Sciences, University of Yamanashi, Kofu,  
Yamanashi, Japan<sup>a</sup>, Food Research Institute, National Agriculture and Food Research  
Organization, Tsukuba, Ibaraki, Japan<sup>b</sup>, Department of Life Sciences, Hiroshima  
Institute of Technology, Saeki-ku, Hiroshima, Japan<sup>c</sup>, Institute for Biomedical Science,  
Shinshu University, Nagano, Japan<sup>d</sup>, Chitose Laboratory Co., Nogawa, Kawasaki,  
Japan<sup>e</sup>, Research Institute of Green Science and Technology, Shizuoka University,  
Shizuoka, Japan<sup>f</sup>, Faculty of Life Sciences, Tokyo University of Agriculture, Tokyo,  
Japan<sup>g</sup>, Nisshin Sugar Co., Ltd., Tokyo, Japan<sup>h</sup>

**Address correspondence to** Kozo Ochi, k.ochi.bz@it-hiroshima.ac.jp

## **Contents**

- Fig. S1** : CITase production by cells grown with various carbon sources
- Fig. S2** : Primer extension analysis of *cit*
- Fig. S3** : In vitro protein synthesis of mutant strains
- Fig. S4** : Transcriptional analysis of the *metK* gene encoding *S*-adenosylmethionine (SAM) synthetase (upper) and intracellular SAM level (lower) in the wild-type and *rsmG* mutant YT362 strains
- Fig. S5** : Production of protease by *Streptomyces coelicolor* A3(2) and its mutant Strains
- Fig. S6** : Enzyme production by the wild-type and mutant strains of *P. agaridevorans* and *S. coelicolor*
- Table S1** : Primers used in this study
- Table S2** : Genes encoding carbohydrate-active enzymes (CAZymes) of *Paenibacillus agaridevolans* T-3040
- Dataset S1** : Metabolome analysis of *P. agaridevorans* wild-type (T-3040) and triple mutant (YT478) strains

Fig. S1

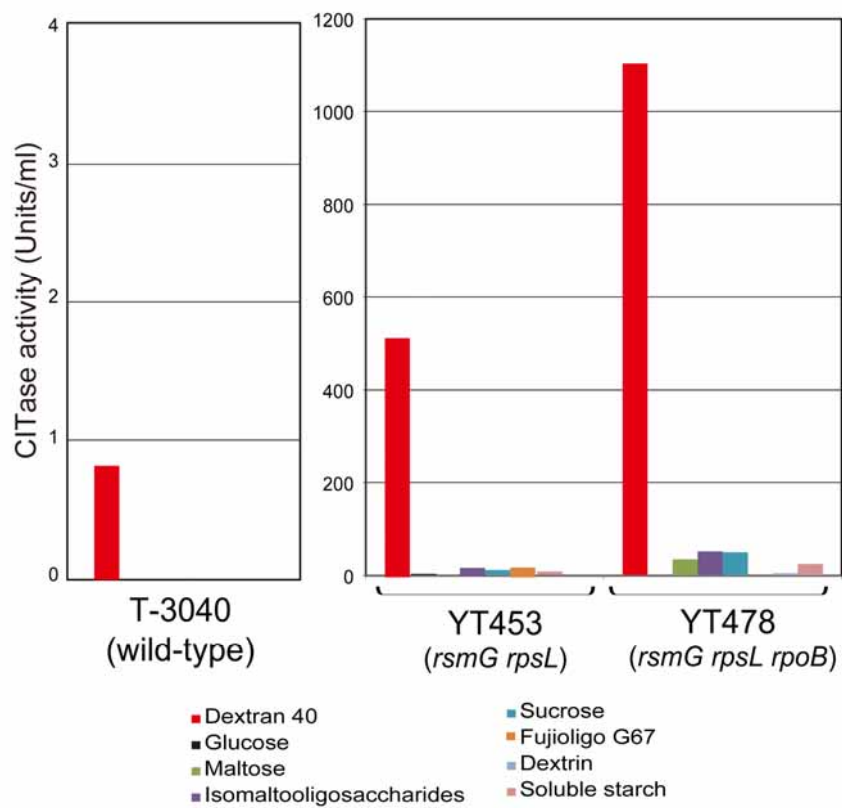

Fig. S1. CITase production by cells grown with various carbon sources. Strains were grown for 72 h in LB-Dex medium containing 2% dextran 40 or LB medium containing 2% glucose, maltose, sucrose, isomaltooligosaccharides Fujioligo G67, dextrin, or soluble starch. CITase activity was measured as in Fig. 1 in the main text.

Fig. S2

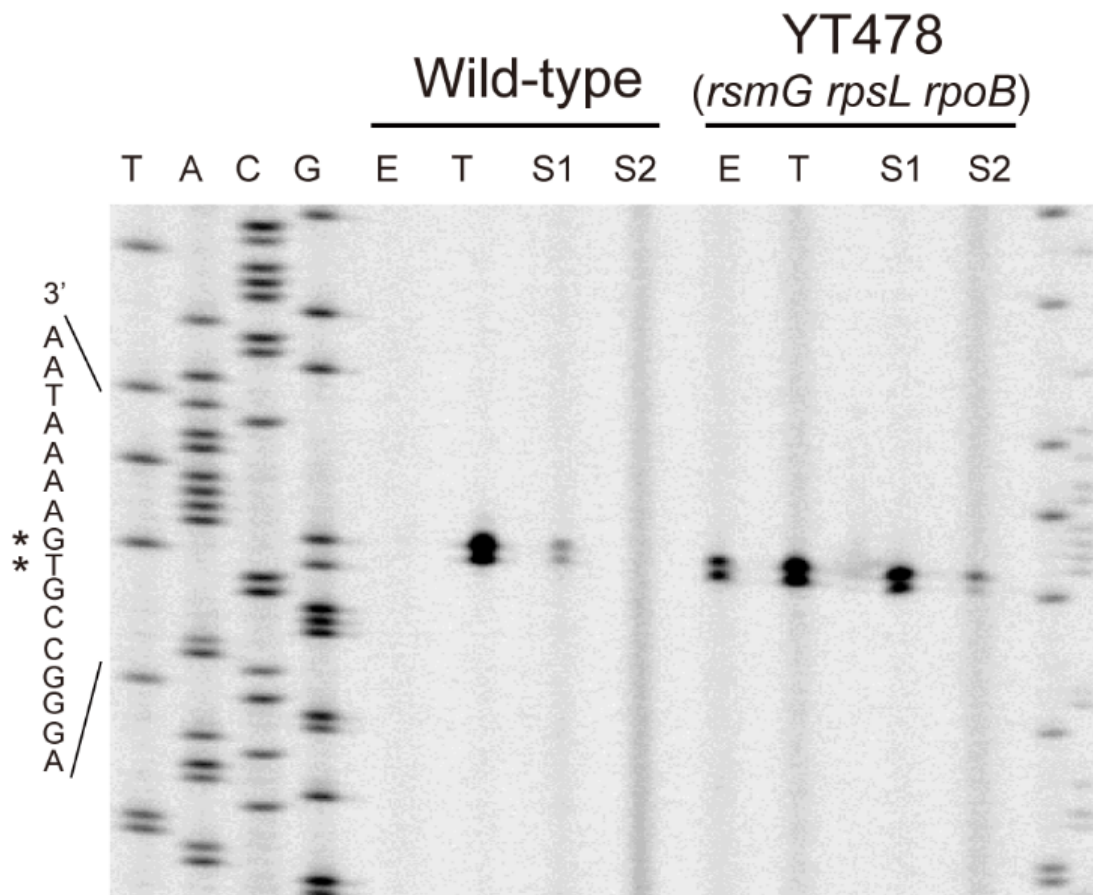

Fig. S2. Primer extension analysis of *cit*. Primer extension analysis was performed with 50  $\mu$ g RNA and 1 pmol of an infrared dye-labeled primer for the CITase gene (*cit*), IRD800-CITase (5'-IRD800-GGAGGGGATACGACGGATGCGACG-3') (Aloka). Primer extension and sequencing reactions were run on polyacrylamide gels, followed by analysis using the DNA sequencing system LIC-4200L(S)-2 (LI-COR). E, T, S1, and S2 indicate exponential phase (OD600=0.2), transition phase (OD600=0.7), early stationary phase (12 h after transition phase) and late stationary phase (24 h after transition phase), respectively.

**Fig. S3**

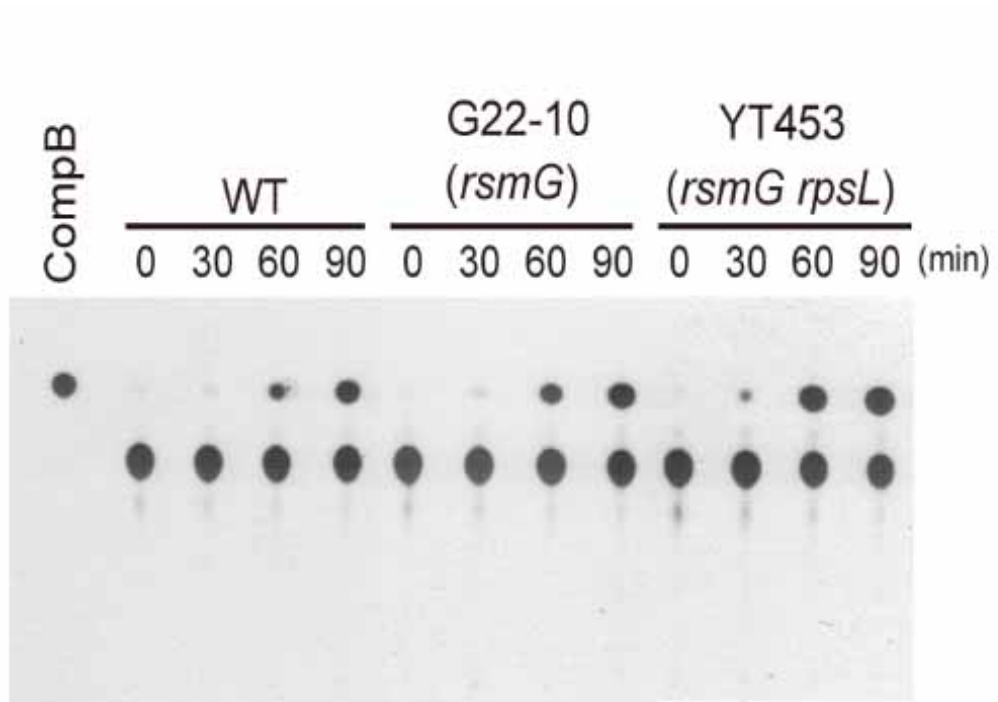

Fig. S3. In vitro protein synthesis activities of mutant strains as determined by chloramphenicol acetyltransferase (CAT) activity. Strains were grown to late exponential phase ( $OD_{600}$  0.4), and cell-free synthesis of CAT by washed ribosomes was performed as described in the main text.

Fig. S4

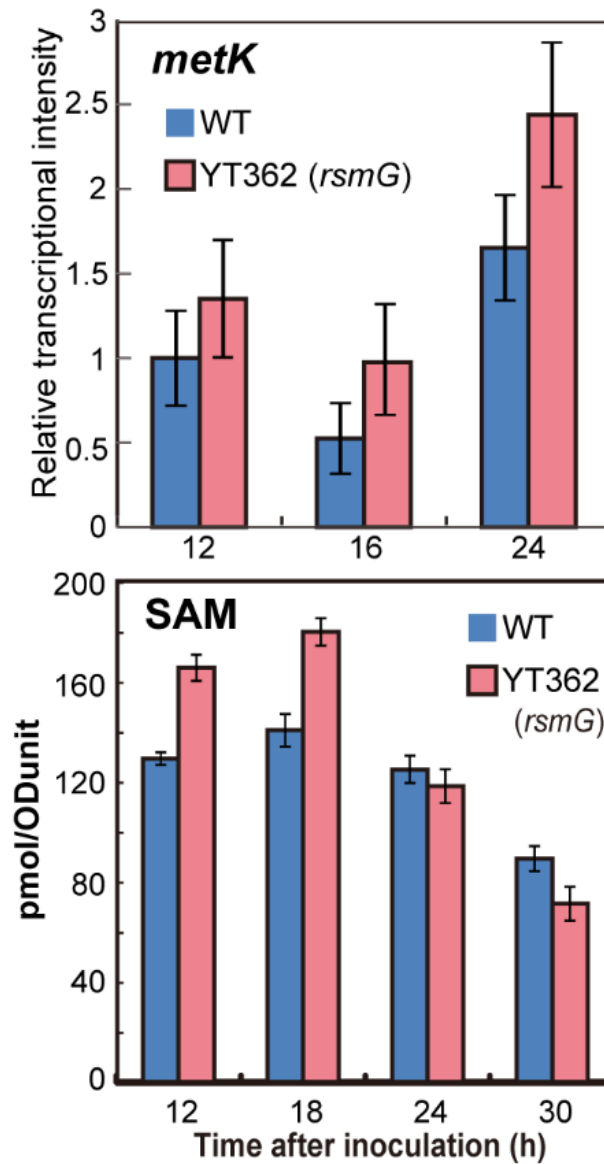

Fig. S4. Transcriptional analysis of the *metK* gene encoding S-adenosylmethionine (SAM) synthetase (upper) and intracellular SAM level (lower) in the wild-type and *rsmG* mutant YT362 strains. Strains were grown in LB-Dex medium for the indicated times. Transcription of *metK* and SAM pool size were determined as described in the main text.

Fig. S5

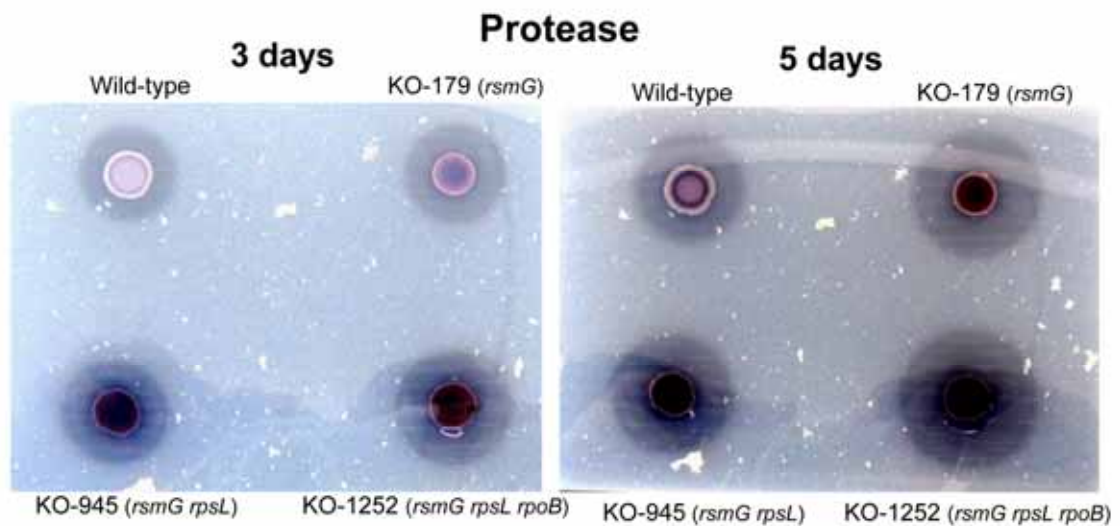

Fig. S5. Production of protease by *Streptomyces coelicolor* A3(2) and its mutant strains. Strains were grown at 30 °C for the indicated periods on skim-milk agar plate for protease production. The halo represents degradation of skim-milk by protease.

Fig. S6

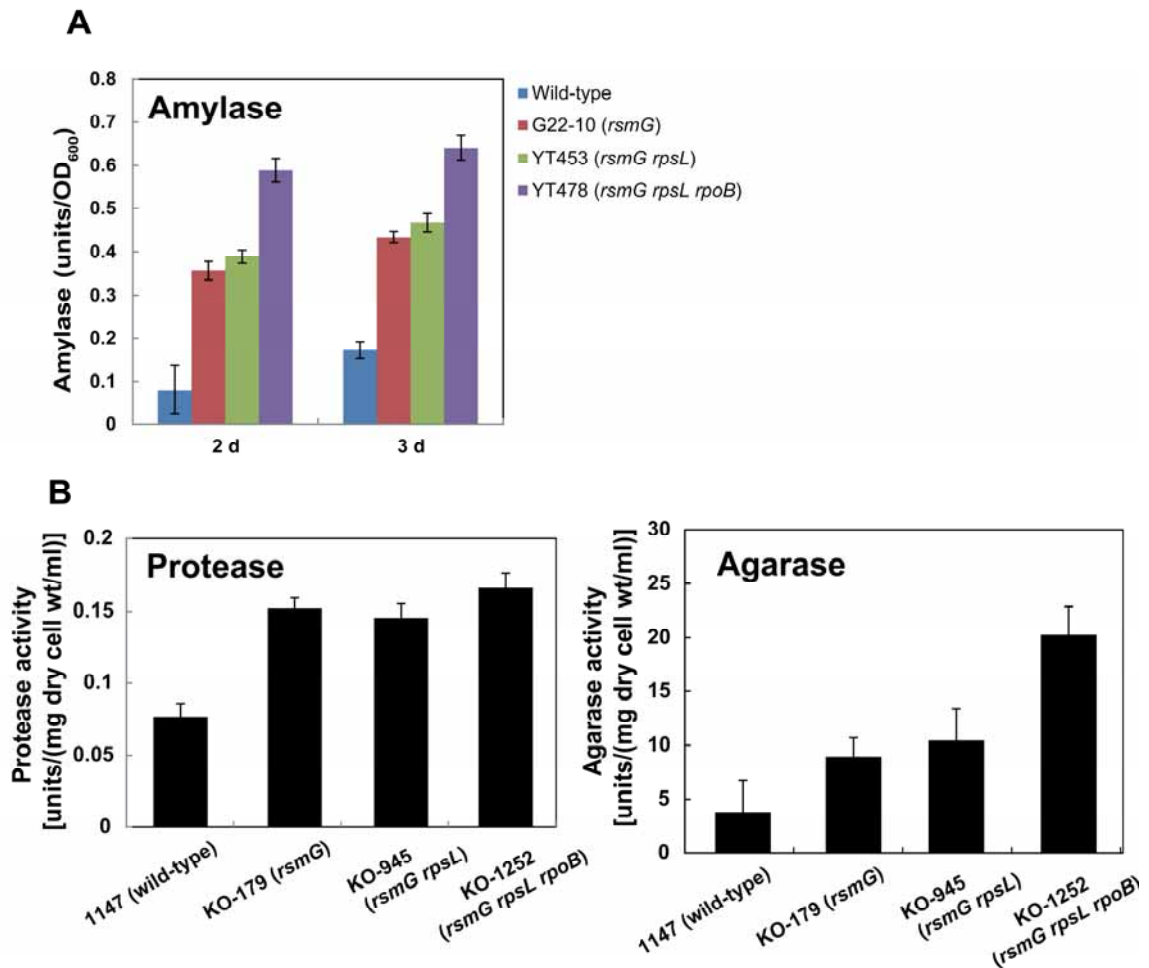

Fig. S6. Enzyme production by the wild-type and mutant strains of *P. agaridevorans* and *S. coelicolor*. (A) Production of amylase by the *P. agaridevorans* wild-type, single, double, and triple mutant strains. (B) Production of protease by *Streptomyces coelicolor* A3(2) and its mutant strains. Productivity of the enzymes are expressed as enzyme activity per unit cell amount (OD600 or mg dry cell weight).



**Table S1. Primers used in this study.**

| Application purpose                  | Primer name | Oligonucleotide sequence (5' 3') |
|--------------------------------------|-------------|----------------------------------|
| PCR and sequencing<br>of <i>rsmG</i> | rsmG-F      | GGTGTTACGCCGGCAGACATTTTC         |
|                                      | rsmG-R      | GAAGTGCTATTCCC GCATGATAACGTAG    |
| PCR and sequencing<br>of <i>rpsL</i> | rpsL-F      | GTTTCCGACATGTACGGGAATTGTCAATTC   |
|                                      | rpsL-R      | GGCATGTAAAGTCCCCCTTTCTTCTAATAG   |
| PCR and sequencing<br>of <i>rpoB</i> | rpoB-F      | GTBGTKCGTGARMGDATGTCNATYCAAGA    |
|                                      | rpoB-R      | ACVGCYTGRCGYTG CATGTTYGC DCCCAT  |
| Real-time PCR<br>of the CITase gene  | RT-CITase-F | CGGCAACTCCATTGATCTCTCCACAC       |
|                                      | RT-CITase-R | GCTTCGTAACGCGTGCCGGCATTGTC       |
| Real-time PCR<br>of 16S rRNA         | RT-16S-F    | GAATGCTAGGTGTTAGGGGTTTCGATAC     |
|                                      | RT-16S-R    | CTAAGATCAAGGGTTGCGCTCGTTGC       |
| Real-time PCR<br>of <i>metK</i>      | RT-metK-F   | GGTCTAACGGGACGGAAAAT             |
|                                      | RT-metK-R   | AGCTGCTGAACGATCAACCT             |

**Table S2. Genes encoding carbohydrate-active enzymes (CAZymes) of *Paenibacillus agaridevolans* T-3040**

| Locus tag     | CAZy family (amino acid residues)                            |
|---------------|--------------------------------------------------------------|
| PAT3040_00009 | AA7(22-245)                                                  |
| PAT3040_00021 | GH88(36-362)                                                 |
| PAT3040_00036 | GH38(240-511)                                                |
| PAT3040_00040 | CBM32(171-275),CBM32(335-442),CBM32(487-602),GH141(671-1057) |
| PAT3040_00041 | GH106(4-703)                                                 |
| PAT3040_00053 | CBM32(1201-1329)                                             |
| PAT3040_00072 | PL26                                                         |
| PAT3040_00074 | GH63(65-365)                                                 |
| PAT3040_00077 | CE10(14-255)                                                 |
| PAT3040_00078 | GH105(381-724)                                               |
| PAT3040_00098 | GH129(321-587)                                               |
| PAT3040_00104 | CBM16(36-150),CBM9(321-476),CBM16(800-862),GH42(922-1215)    |
| PAT3040_00105 | GH36(7-498)                                                  |
| PAT3040_00106 | GH39(101-352)                                                |
| PAT3040_00107 | CE10(34-256)                                                 |
| PAT3040_00113 | GT83(9-204)                                                  |
| PAT3040_00115 | CBM50(627-675)                                               |
| PAT3040_00118 | CBM67(10-204),GH78(269-781)                                  |
| PAT3040_00125 | GT2(60-260)                                                  |
| PAT3040_00127 | GH5(88-415)                                                  |
| PAT3040_00137 | GH39(773-994),CBM9(1297-1448)                                |
| PAT3040_00142 | CBM16(43-150),CBM9(332-485),CBM16(747-864),GH42(922-1114)    |
| PAT3040_00149 | CE3(52-196)                                                  |
| PAT3040_00150 | CBM66(77-231),CBM66(242-376),GH136(390-783),CBM9(1062-1262)  |
| PAT3040_00154 | GH109(4-118)                                                 |
| PAT3040_00163 | CBM32(33-127),CBM6(188-294)                                  |
| PAT3040_00166 | GH2(17-497)                                                  |
| PAT3040_00167 | GH43(46-309),CBM66(354-476),CBM66(682-837)                   |
| PAT3040_00173 | CBM6(526-645),CBM6(655-779),CBM6(809-922)                    |

|               |                                                                                              |
|---------------|----------------------------------------------------------------------------------------------|
| PAT3040_00203 | CBM44(465-514)                                                                               |
| PAT3040_00213 | GH38(7-262)                                                                                  |
| PAT3040_00214 | GH63(234-596)                                                                                |
| PAT3040_00215 | CBM54(207-314)                                                                               |
| PAT3040_00216 | CBM67(81-238),GH78(279-783)                                                                  |
| PAT3040_00223 | GH28(18-366)                                                                                 |
| PAT3040_00227 | CBM16(65-119),CBM16(192-274)                                                                 |
| PAT3040_00234 | GH99(29-366)                                                                                 |
| PAT3040_00236 | CBM32(237-351),GH140(367-686),CBM32(789-894),CBM32(920-1027),CBM56(715-804)                  |
| PAT3040_00259 | CBM50(35-79),CBM50(88-134),CBM50(142-189)                                                    |
| PAT3040_00278 | CBM16(31-153),GH123(669-890)                                                                 |
| PAT3040_00280 | CBM67(12-127),GH78(276-772)                                                                  |
| PAT3040_00281 | GH36(113-607)                                                                                |
| PAT3040_00287 | GH2(2-735)                                                                                   |
| PAT3040_00298 | PL1(406-587)                                                                                 |
| PAT3040_00317 | CBM9(16-205)                                                                                 |
| PAT3040_00331 | CBM44(187-260),CBM32(290-416),GH78(489-747),CBM32(943-1067),GH20(1297-1613),CBM32(1839-1962) |
| PAT3040_00338 | GH78(165-646)                                                                                |
| PAT3040_00339 | GH20(87-402)                                                                                 |
| PAT3040_00356 | GH106(14-693)                                                                                |
| PAT3040_00357 | GH15(294-497)                                                                                |
| PAT3040_00358 | GH109(4-119)                                                                                 |
| PAT3040_00359 | GH109(3-100)                                                                                 |
| PAT3040_00363 | GH129(83-482)                                                                                |
| PAT3040_00367 | CBM35(300-392)                                                                               |
| PAT3040_00376 | CBM9(1621-1796)                                                                              |
| PAT3040_00379 | GH78(161-645)                                                                                |
| PAT3040_00381 | CE15(19-340)                                                                                 |
| PAT3040_00407 | GH88(42-366)                                                                                 |
| PAT3040_00459 | GH4(3-179)                                                                                   |
| PAT3040_00460 | CBM67(2-96),GH78(254-742)                                                                    |

|               |                                              |
|---------------|----------------------------------------------|
| PAT3040_00473 | PL5(119-216)                                 |
| PAT3040_00481 | CBM66(199-320),CBM66(343-503),GH145(605-883) |
| PAT3040_00503 | GH29(34-246)                                 |
| PAT3040_00511 | GH109(2-114)                                 |
| PAT3040_00525 | GH2(13-478)                                  |
| PAT3040_00544 | GH109(6-118)                                 |
| PAT3040_00572 | GT4(200-341)                                 |
| PAT3040_00592 | PL17(397-514)                                |
| PAT3040_00593 | PL15(504-641)                                |
| PAT3040_00613 | GH88(42-362)                                 |
| PAT3040_00629 | GH23(125-236)                                |
| PAT3040_00753 | GT51(83-270)                                 |
| PAT3040_00781 | PL22(113-241)                                |
| PAT3040_00784 | GH39(519-787),CBM9(1086-1232)                |
| PAT3040_00791 | GH109(5-120)                                 |
| PAT3040_00804 | GT2(5-103)                                   |
| PAT3040_00885 | GT2(5-119)                                   |
| PAT3040_00889 | GT2(5-127)                                   |
| PAT3040_00890 | GT2(1-150)                                   |
| PAT3040_00891 | GT4(194-349)                                 |
| PAT3040_00892 | GT2(8-141)                                   |
| PAT3040_00896 | GH109(5-114)                                 |
| PAT3040_00923 | CE14(11-120)                                 |
| PAT3040_00930 | GH4(9-185)                                   |
| PAT3040_00938 | CE4(316-437)                                 |
| PAT3040_00959 | CE1(91-231)                                  |
| PAT3040_00970 | GH123(84-528)                                |
| PAT3040_00972 | GH109(3-57)                                  |
| PAT3040_00976 | PL9(140-431)                                 |
| PAT3040_00987 | CBM54(228-334),CBM9(1056-1203)               |
| PAT3040_00988 | GH29(23-192)                                 |

|               |                            |
|---------------|----------------------------|
| PAT3040_00989 | GH2(25-557)                |
| PAT3040_00994 | GH109(15-132)              |
| PAT3040_01001 | CE4(25-142)                |
| PAT3040_01007 | GH18(251-549)              |
| PAT3040_01009 | GH109(2-116)               |
| PAT3040_01010 | GH109(66-113)              |
| PAT3040_01017 | GH33(27-352)               |
| PAT3040_01018 | GH117(44-122)              |
| PAT3040_01019 | CBM16(930-1052)            |
| PAT3040_01020 | CE3(19-204)                |
| PAT3040_01039 | GH51(3-502)                |
| PAT3040_01099 | GH38(4-271)                |
| PAT3040_01113 | CE9(3-375)                 |
| PAT3040_01183 | CBM70(19-186),PL8(652-915) |
| PAT3040_01184 | PL8(392-650)               |
| PAT3040_01195 | GT28(189-335)              |
| PAT3040_01199 | GH109(55-125)              |
| PAT3040_01201 | GH109(4-112)               |
| PAT3040_01221 | GH2(36-905)                |
| PAT3040_01282 | CBM35(302-456)             |
| PAT3040_01285 | GH88(56-375)               |
| PAT3040_01301 | GT39(31-245)               |
| PAT3040_01312 | GT4(207-353)               |
| PAT3040_01314 | GT2(46-214)                |
| PAT3040_01336 | GH109(4-119)               |
| PAT3040_01342 | GH109(7-122)               |
| PAT3040_01344 | GH109(55-111)              |
| PAT3040_01346 | GH109(6-129)               |
| PAT3040_01356 | GH127(2-361)               |
| PAT3040_01357 | GH127(10-171)              |
| PAT3040_01371 | CBM53(9-64)                |

|               |                                                                                                                 |
|---------------|-----------------------------------------------------------------------------------------------------------------|
| PAT3040_01387 | CBM50(160-205)                                                                                                  |
| PAT3040_01406 | PL22(124-216)                                                                                                   |
| PAT3040_01412 | CE12(143-303)                                                                                                   |
| PAT3040_01416 | CBM16(47-184),GH5(354-468),CBM16(960-1086)                                                                      |
| PAT3040_01418 | GH109(3-103)                                                                                                    |
| PAT3040_01419 | GH109(47-118)                                                                                                   |
| PAT3040_01420 | GH109(8-110)                                                                                                    |
| PAT3040_01429 | GH109(4-118)                                                                                                    |
| PAT3040_01430 | GH28(216-563),CBM66(613-757),CBM66(886-1043)                                                                    |
| PAT3040_01431 | GH28(179-517),CBM66(551-708)                                                                                    |
| PAT3040_01440 | CBM54(207-318),CBM22(609-739),CBM16(1375-1490),CBM22(1628-1744)                                                 |
| PAT3040_01457 | CBM54(63-175),CBM16(1264-1367)                                                                                  |
| PAT3040_01463 | GH2(10-569)                                                                                                     |
| PAT3040_01486 | GH4(3-175)                                                                                                      |
| PAT3040_01487 | GH109(4-118)                                                                                                    |
| PAT3040_01493 | CBM32(39-150),GH42(222-407),CBM38(965-1091),CBM38(1110-1248),CBM38(1267-1392),CBM32(1411-1474),CBM32(1484-1613) |
| PAT3040_01499 | CBM32(4-125),GH42(207-400),CBM38(979-1112)                                                                      |
| PAT3040_01501 | GH29(7-329)                                                                                                     |
| PAT3040_01503 | GH2(139-749)                                                                                                    |
| PAT3040_01504 | GH95(247-702)                                                                                                   |
| PAT3040_01505 | CBM67(97-292),GH78(366-932)                                                                                     |
| PAT3040_01506 | GH105(28-369)                                                                                                   |
| PAT3040_01507 | GH143(8-559)                                                                                                    |
| PAT3040_01509 | GH28(3-331)                                                                                                     |
| PAT3040_01510 | GH138(3-903)                                                                                                    |
| PAT3040_01511 | PL2(14-499)                                                                                                     |
| PAT3040_01519 | GH142(208-701)                                                                                                  |
| PAT3040_01520 | GH33(37-340)                                                                                                    |
| PAT3040_01522 | GH140(102-369)                                                                                                  |
| PAT3040_01524 | CBM35(325-415)                                                                                                  |
| PAT3040_01528 | GH129(150-740)                                                                                                  |

|               |                                              |
|---------------|----------------------------------------------|
| PAT3040_01535 | CE8(4-294)                                   |
| PAT3040_01536 | GH33(13-311)                                 |
| PAT3040_01537 | CE7(141-243)                                 |
| PAT3040_01538 | GH138(2-887)                                 |
| PAT3040_01539 | GH106(7-713)                                 |
| PAT3040_01543 | GH109(5-118)                                 |
| PAT3040_01545 | GH59(321-1049)                               |
| PAT3040_01551 | CBM66(36-186),GH43(680-884),CBM57(1077-1160) |
| PAT3040_01553 | GH88(43-366)                                 |
| PAT3040_01569 | PL8(407-665)                                 |
| PAT3040_01571 | GH88(59-386)                                 |
| PAT3040_01573 | CE13(36-220)                                 |
| PAT3040_01590 | CBM22(43-167),CBM22(205-317)                 |
| PAT3040_01640 | CBM37(130-180),CBM37(220-262)                |
| PAT3040_01663 | GH105(44-356)                                |
| PAT3040_01670 | CBM13(985-1113)                              |
| PAT3040_01704 | CBM9(1159-1296)                              |
| PAT3040_01711 | GH109(7-116)                                 |
| PAT3040_01712 | GH109(6-123)                                 |
| PAT3040_01713 | GH116(399-745)                               |
| PAT3040_01714 | CBM6(10-109)                                 |
| PAT3040_01715 | CBM67(2-125),GH78(186-685)                   |
| PAT3040_01749 | GT2(6-104)                                   |
| PAT3040_01797 | GH130(16-330)                                |
| PAT3040_01805 | CBM13(17-145)                                |
| PAT3040_01811 | CE14(4-111)                                  |
| PAT3040_01815 | GH95(1-729)                                  |
| PAT3040_01823 | GH101(48-524)                                |
| PAT3040_01824 | GH109(1-119)                                 |
| PAT3040_01849 | GH78(163-629)                                |
| PAT3040_01870 | GH109(1-109)                                 |

|               |                                               |
|---------------|-----------------------------------------------|
| PAT3040_01880 | CE3(19-204)                                   |
| PAT3040_01883 | CBM32(86-176),GH33(313-602)                   |
| PAT3040_01890 | CE7(44-166)                                   |
| PAT3040_01895 | GH127(64-509)                                 |
| PAT3040_01896 | CBM32(31-151),CBM32(636-753),CBM32(871-991)   |
| PAT3040_01897 | GH99(50-351)                                  |
| PAT3040_01917 | CBM32(67-193),CBM32(688-807)                  |
| PAT3040_01934 | CE4(15-136)                                   |
| PAT3040_01935 | CBM54(123-235),GH82(874-933)                  |
| PAT3040_01936 | CBM6(681-776)                                 |
| PAT3040_01998 | GH39(108-286)                                 |
| PAT3040_02056 | GH120(114-170)                                |
| PAT3040_02062 | GH35(40-381)                                  |
| PAT3040_02063 | GH29(13-376)                                  |
| PAT3040_02066 | GH109(5-127)                                  |
| PAT3040_02067 | GH110(17-567)                                 |
| PAT3040_02077 | GH36(166-407)                                 |
| PAT3040_02078 | GH129(10-631)                                 |
| PAT3040_02080 | GH5(12-394)                                   |
| PAT3040_02081 | GT32(61-132)                                  |
| PAT3040_02082 | GH29(4-315)                                   |
| PAT3040_02117 | CBM11(114-178),CBM11(441-518),PL17(1065-1189) |
| PAT3040_02121 | GH109(6-108)                                  |
| PAT3040_02127 | CBM40(164-241),GH136(253-734),CBM9(774-937)   |
| PAT3040_02128 | GH29(5-305),CBM32(321-392)                    |
| PAT3040_02172 | GT103(34-105)                                 |
| PAT3040_02186 | CBM16(1124-1246)                              |
| PAT3040_02205 | GH43(60-346),CBM35(373-495)                   |
| PAT3040_02208 | GH105(48-370)                                 |
| PAT3040_02215 | GH109(34-97)                                  |
| PAT3040_02217 | PL1(253-440),CBM37(665-717)                   |



|               |                                             |
|---------------|---------------------------------------------|
| PAT3040_02223 | GT101(1-115)                                |
| PAT3040_02225 | GT2(5-106)                                  |
| PAT3040_02226 | GH105(6-182)                                |
| PAT3040_02227 | GT4(229-373)                                |
| PAT3040_02228 | GT4(226-373)                                |
| PAT3040_02230 | GT2(6-116)                                  |
| PAT3040_02231 | GT4(135-282)                                |
| PAT3040_02240 | CBM32(882-1013),CBM40(334-445)              |
| PAT3040_02245 | CBM67(118-295),GH78(324-840)                |
| PAT3040_02251 | CE7(4-316)                                  |
| PAT3040_02252 | CBM40(1115-1193),CBM40(1295-1403)           |
| PAT3040_02295 | CBM16(918-1034)                             |
| PAT3040_02301 | GH23(54-184)                                |
| PAT3040_02316 | CBM32(39-164),GH20(391-697),CBM32(919-1039) |
| PAT3040_02317 | CBM32(35-171),CBM32(713-834)                |
| PAT3040_02324 | GT51(72-247)                                |
| PAT3040_02336 | CBM34(8-125),GH13(160-471)                  |
| PAT3040_02342 | GH2(397-1012)                               |
| PAT3040_02348 | GH38(4-263)                                 |
| PAT3040_02349 | GH2(21-707)                                 |
| PAT3040_02371 | GH117(79-205),GH117(208-321)                |
| PAT3040_02381 | GH63(226-528)                               |
| PAT3040_02383 | GH109(2-103)                                |
| PAT3040_02384 | GH109(22-137)                               |
| PAT3040_02391 | GH28(28-354)                                |
| PAT3040_02424 | GH109(15-126)                               |
| PAT3040_02425 | CBM16(44-146)                               |
| PAT3040_02431 | GH2(42-662)                                 |
| PAT3040_02434 | CBM40(41-88)                                |
| PAT3040_02457 | CE1(24-240)                                 |
| PAT3040_02495 | CE4(413-571)                                |

|               |                                                |
|---------------|------------------------------------------------|
| PAT3040_02502 | CE3(55-205)                                    |
| PAT3040_02535 | GH109(7-126)                                   |
| PAT3040_02539 | CE3(82-209)                                    |
| PAT3040_02543 | GH141(24-545),CBM66(817-977),CBM66(1076-1222)  |
| PAT3040_02559 | GT4(193-334)                                   |
| PAT3040_02565 | GT4(226-373)                                   |
| PAT3040_02576 | GT26(60-228)                                   |
| PAT3040_02585 | GT2(3-158)                                     |
| PAT3040_02586 | GT2(8-161)                                     |
| PAT3040_02624 | GH141(110-292)                                 |
| PAT3040_02639 | GH130(16-330)                                  |
| PAT3040_02648 | CBM66(1416-1532)                               |
| PAT3040_02698 | CE1(39-158)                                    |
| PAT3040_02708 | GT2(6-140)                                     |
| PAT3040_02710 | GT2(17-213)                                    |
| PAT3040_02738 | CBM50(273-313)                                 |
| PAT3040_02787 | GH109(7-122)                                   |
| PAT3040_02789 | GH109(5-115)                                   |
| PAT3040_02797 | PL8(617-874),CBM66(1041-1183),CBM66(1228-1354) |
| PAT3040_02843 | AA2(60-174),AA2(449-706)                       |
| PAT3040_02854 | GH42(14-389)                                   |
| PAT3040_02856 | GH140(10-437)                                  |
| PAT3040_02864 | GH78(58-578)                                   |
| PAT3040_02866 | GH2(43-933)                                    |
| PAT3040_02906 | GH95(1-339)                                    |
| PAT3040_02910 | GH105(32-360)                                  |
| PAT3040_02913 | GH109(6-114)                                   |
| PAT3040_02916 | CE9(9-346)                                     |
| PAT3040_02923 | CE1(51-275)                                    |
| PAT3040_02926 | AA3(25-313)                                    |
| PAT3040_02940 | CBM40(159-245)                                 |

|               |                                                                                 |
|---------------|---------------------------------------------------------------------------------|
| PAT3040_02943 | GH140(107-367)                                                                  |
| PAT3040_02946 | GH43(41-232)                                                                    |
| PAT3040_02951 | GH33(32-333)                                                                    |
| PAT3040_02953 | GH142(216-703)                                                                  |
| PAT3040_02961 | GH109(7-113)                                                                    |
| PAT3040_02962 | PL17(819-931)                                                                   |
| PAT3040_02963 | GH109(2-110)                                                                    |
| PAT3040_02965 | CE12(13-178)                                                                    |
| PAT3040_02969 | GH2(35-650)                                                                     |
| PAT3040_02988 | GH88(45-363)                                                                    |
| PAT3040_02990 | GH29(34-378)                                                                    |
| PAT3040_03055 | GH109(2-112)                                                                    |
| PAT3040_03056 | GH109(15-117)                                                                   |
| PAT3040_03060 | GH105(26-334)                                                                   |
| PAT3040_03061 | GH42(14-389)                                                                    |
| PAT3040_03064 | GH2(2-534)                                                                      |
| PAT3040_03069 | CE12(96-304),CE12(773-968)                                                      |
| PAT3040_03078 | GH35(11-323)                                                                    |
| PAT3040_03080 | GH78(168-638)                                                                   |
| PAT3040_03093 | CBM32(47-181),CBM32(741-872),CBM32(1258-1397),CBM66(1441-1576),CBM66(2098-2251) |
| PAT3040_03099 | CBM16(582-698),CBM16(1456-1575),CBM16(1612-1726),CBM54(222-332),CBM9(1279-1417) |
| PAT3040_03109 | CE12(51-161)                                                                    |
| PAT3040_03113 | GH129(344-745)                                                                  |
| PAT3040_03142 | PL17(612-709)                                                                   |
| PAT3040_03143 | PL12(771-846)                                                                   |
| PAT3040_03144 | CE15(201-338),CE7(141-244)                                                      |
| PAT3040_03145 | GH95(49-871)                                                                    |
| PAT3040_03147 | GH43(7-264)                                                                     |
| PAT3040_03148 | GH43(22-295)                                                                    |
| PAT3040_03149 | GH146(40-511)                                                                   |
| PAT3040_03150 | CBM37(886-944),CBM40(735-862),CBM40(1070-1171),CBM40(1258-1379)                 |

|               |                                                             |
|---------------|-------------------------------------------------------------|
| PAT3040_03156 | GH28(202-456)                                               |
| PAT3040_03188 | GH3(104-329)                                                |
| PAT3040_03194 | GH130(4-332)                                                |
| PAT3040_03195 | CBM56(150-238),CBM56(685-871),GH16(427-679)                 |
| PAT3040_03202 | GH16(8-242)                                                 |
| PAT3040_03204 | CE14(4-109)                                                 |
| PAT3040_03209 | GH29(29-212)                                                |
| PAT3040_03210 | GH109(30-158)                                               |
| PAT3040_03211 | GH109(4-119)                                                |
| PAT3040_03225 | GH109(4-111)                                                |
| PAT3040_03227 | CE14(4-113)                                                 |
| PAT3040_03239 | CBM67(124-305),GH78(331-847)                                |
| PAT3040_03260 | CE4(34-141)                                                 |
| PAT3040_03282 | GH43(8-274)                                                 |
| PAT3040_03300 | GH130(21-335)                                               |
| PAT3040_03306 | CE3(62-200)                                                 |
| PAT3040_03329 | CBM50(4-48),CBM50(65-109)                                   |
| PAT3040_03357 | CBM50(495-536)                                              |
| PAT3040_03400 | GH38(7-273)                                                 |
| PAT3040_03404 | GH125(35-430)                                               |
| PAT3040_03413 | CE9(12-387)                                                 |
| PAT3040_03424 | CBM16(667-769),GH16(43-294),GH16(327-586)                   |
| PAT3040_03445 | CE1(2-180)                                                  |
| PAT3040_03477 | CBM9(243-432)                                               |
| PAT3040_03524 | GH109(8-109)                                                |
| PAT3040_03530 | CE3(54-155)                                                 |
| PAT3040_03538 | GH36(24-728)                                                |
| PAT3040_03541 | GH4(13-193)                                                 |
| PAT3040_03542 | CBM32(538-653),CBM35(898-956)                               |
| PAT3040_03543 | CBM16(921-979),CBM32(392-540),CBM32(767-884),CBM37(669-720) |
| PAT3040_03549 | GH117(41-278)                                               |

|               |                                                                                                                  |
|---------------|------------------------------------------------------------------------------------------------------------------|
| PAT3040_03551 | GH31(176-613)                                                                                                    |
| PAT3040_03563 | PL12(403-536)                                                                                                    |
| PAT3040_03571 | GH29(11-314)                                                                                                     |
| PAT3040_03576 | GH141(55-542),CBM32(743-855),CBM32(895-1007),CBM32(1039-1141),CBM32(1170-1283),CBM32(1562-1663),CBM46(1702-1771) |
| PAT3040_03577 | GH109(1-110)                                                                                                     |
| PAT3040_03583 | GH109(30-121)                                                                                                    |
| PAT3040_03601 | AA3(157-704)                                                                                                     |
| PAT3040_03631 | GT4(168-316)                                                                                                     |
| PAT3040_03632 | GT2(2-125)                                                                                                       |
| PAT3040_03633 | GT4(187-291)                                                                                                     |
| PAT3040_03634 | GT2(11-116)                                                                                                      |
| PAT3040_03636 | GT32(26-104)                                                                                                     |
| PAT3040_03652 | GH106(1-672)                                                                                                     |
| PAT3040_03660 | GH76(53-209)                                                                                                     |
| PAT3040_03664 | GH31(324-578)                                                                                                    |
| PAT3040_03667 | CBM22(324-438)                                                                                                   |
| PAT3040_03671 | CE10(24-272)                                                                                                     |
| PAT3040_03690 | CBM67(12-198),GH78(478-984)                                                                                      |
| PAT3040_03698 | GH78(469-746)                                                                                                    |
| PAT3040_03725 | AA6(28-103)                                                                                                      |
| PAT3040_03747 | PL8(404-681)                                                                                                     |
| PAT3040_03750 | GH5(67-390)                                                                                                      |
| PAT3040_03758 | CBM32(97-211),CBM32(229-342),CBM32(359-477),CBM32(839-957),CBM32(971-1086),CBM32(1102-1218)                      |
| PAT3040_03786 | GH31(238-667)                                                                                                    |
| PAT3040_03841 | GH95(1-572)                                                                                                      |
| PAT3040_03842 | GH136(170-644)                                                                                                   |
| PAT3040_03877 | GH109(25-128)                                                                                                    |
| PAT3040_03880 | GH109(5-120)                                                                                                     |
| PAT3040_03882 | GH43(47-327),CBM66(373-483)                                                                                      |
| PAT3040_03886 | GT2(9-124),GT21(77-197)                                                                                          |
| PAT3040_03902 | GH88(43-364)                                                                                                     |

|               |                                                                             |
|---------------|-----------------------------------------------------------------------------|
| PAT3040_03926 | GH29(9-343)                                                                 |
| PAT3040_03946 | GH73(25-150)                                                                |
| PAT3040_03963 | CBM32(70-186),CBM32(229-342),CBM32(385-504)                                 |
| PAT3040_03974 | CE4(49-174)                                                                 |
| PAT3040_04009 | GH38(8-279)                                                                 |
| PAT3040_04013 | CBM32(561-654)                                                              |
| PAT3040_04014 | CBM32(569-623),CBM32(690-758)                                               |
| PAT3040_04016 | GH109(32-111)                                                               |
| PAT3040_04062 | GH109(5-112)                                                                |
| PAT3040_04074 | GH78(200-695)                                                               |
| PAT3040_04079 | GH109(2-117)                                                                |
| PAT3040_04080 | CE12(139-308)                                                               |
| PAT3040_04083 | CE7(42-281)                                                                 |
| PAT3040_04090 | GH129(91-749)                                                               |
| PAT3040_04094 | CBM35(95-131)                                                               |
| PAT3040_04096 | CE6(122-215)                                                                |
| PAT3040_04305 | CE4(142-267)                                                                |
| PAT3040_04349 | GH8(59-368)                                                                 |
| PAT3040_04360 | GH2(16-530)                                                                 |
| PAT3040_04368 | CBM32(50-171),CBM32(182-303),CBM32(325-443),CBM32(458-576),CBM32(1161-1212) |
| PAT3040_04382 | GH26(217-362)                                                               |
| PAT3040_04414 | GH109(3-120)                                                                |
| PAT3040_04437 | CE4(5-128)                                                                  |
| PAT3040_04456 | GH109(4-117)                                                                |
| PAT3040_04468 | CBM67(2-134),GH78(181-694)                                                  |
| PAT3040_04486 | GH95(4-732)                                                                 |
| PAT3040_04492 | GH109(5-113)                                                                |
| PAT3040_04494 | GH42(15-393)                                                                |
| PAT3040_04511 | CE1(32-237)                                                                 |
| PAT3040_04542 | CBM32(191-326)                                                              |
| PAT3040_04557 | CE1(48-285)                                                                 |

|               |                                                            |
|---------------|------------------------------------------------------------|
| PAT3040_04579 | GT28(209-340)                                              |
| PAT3040_04620 | GH109(4-119)                                               |
| PAT3040_04622 | CBM50(32-75)                                               |
| PAT3040_04623 | CE4(21-141)                                                |
| PAT3040_04674 | CBM16(55-151),CBM16(848-938),CBM9(404-555),GH42(1001-1288) |
| PAT3040_04677 | GH105(28-339)                                              |
| PAT3040_04687 | GH38(3-252)                                                |
| PAT3040_04693 | CBM32(71-186)                                              |
| PAT3040_04711 | GH109(8-117)                                               |
| PAT3040_04719 | GH136(572-1076)                                            |
| PAT3040_04727 | CBM57(1116-1268)                                           |
| PAT3040_04728 | GH109(4-103)                                               |
| PAT3040_04730 | GH38(3-263)                                                |
| PAT3040_04731 | GH38(12-269)                                               |
| PAT3040_04750 | CE3(7-208)                                                 |
| PAT3040_04763 | GH105(27-344)                                              |
| PAT3040_04765 | CE1(4-151)                                                 |
| PAT3040_04819 | CE1(107-322)                                               |
| PAT3040_04837 | CE4(261-388)                                               |
| PAT3040_04850 | CBM16(55-144),CBM9(300-472),GH42(921-1203)                 |
| PAT3040_04856 | GH4(7-184)                                                 |
| PAT3040_04879 | CBM50(4-47),CBM50(55-98),GH18(176-407)                     |
| PAT3040_04899 | CBM67(9-192),GH78(253-758)                                 |
| PAT3040_04901 | CE3(1155-1308)                                             |
| PAT3040_04902 | CE7(467-627)                                               |
| PAT3040_04905 | CE4(158-276)                                               |
| PAT3040_04910 | CE7(89-250)                                                |
| PAT3040_04971 | GH13(63-366),CBM26(637-700),CBM32(1446-1557)               |
| PAT3040_05000 | GH109(6-120)                                               |
| PAT3040_05002 | GH29(27-230)                                               |
| PAT3040_05003 | GH141(27-548),CBM32(650-757)                               |

|                      |                                                                                                            |
|----------------------|------------------------------------------------------------------------------------------------------------|
| PAT3040_05050        | GH2(2-735)                                                                                                 |
| PAT3040_05054        | CE3(58-212)                                                                                                |
| PAT3040_05056        | CBM54(224-319),CBM16(425-508),GH5(734-822),CBM16(1345-1469)                                                |
| PAT3040_05061        | GH109(9-120)                                                                                               |
| PAT3040_05062        | CE7(85-247),CE15(201-354)                                                                                  |
| PAT3040_05063        | GH109(5-119)                                                                                               |
| PAT3040_05065        | CE9(14-375)                                                                                                |
| PAT3040_05067        | CBM16(766-892)                                                                                             |
| PAT3040_05069        | GH42(20-390)                                                                                               |
| PAT3040_05070        | PL12(412-550)                                                                                              |
| PAT3040_05088        | GH4(3-180)                                                                                                 |
| PAT3040_05107        | CE12(141-305)                                                                                              |
| PAT3040_05111        | CE1(123-347)                                                                                               |
| PAT3040_05121        | GT2(3-138)                                                                                                 |
| PAT3040_05139        | CE12(6-205)                                                                                                |
| PAT3040_05144        | PL11(44-648)                                                                                               |
| PAT3040_05146        | PL26(9-858)                                                                                                |
| PAT3040_05155        | PL21(325-391)                                                                                              |
| PAT3040_05181        | CE7(4-316)                                                                                                 |
| PAT3040_05182        | GH43(43-337)                                                                                               |
| PAT3040_05183        | GH43(9-301)                                                                                                |
| <b>PAT3040_05188</b> | <b>GH66(42-428,540-735),CBM35(42-541),CBM35(747-866)</b>                                                   |
| PAT3040_05194        | GH109(6-113)                                                                                               |
| <b>PAT3040_05195</b> | <b>CBM35(6-99),CBM35(109-231),CBM61(244-392)</b>                                                           |
| <b>PAT3040_05196</b> | <b>putative GH31(238-667)</b>                                                                              |
| PAT3040_05198        | GH109(2-114)                                                                                               |
| PAT3040_05205        | GH95(314-754)                                                                                              |
| PAT3040_05211        | GH95(4-750)                                                                                                |
| PAT3040_05212        | CE15(7-371)                                                                                                |
| PAT3040_05214        | GH18(269-531)                                                                                              |
| PAT3040_05223        | GH27(45-218),CBM46(516-583),CBM46(614-679),CBM46(842-895),CBM46(918-989),CBM46(1010-1082),CBM46(1338-1290) |



|               |                              |
|---------------|------------------------------|
| PAT3040_05224 | GH110(7-556)                 |
| PAT3040_05264 | CBM32(64-122)                |
| PAT3040_05273 | CBM16(212-333),CBM70(39-191) |
| PAT3040_05280 | GH105(29-366)                |
| PAT3040_05287 | GH43(14-295)                 |
| PAT3040_05288 | GH127(19-448)                |
| PAT3040_05323 | GH13(73-426)                 |
| PAT3040_05330 | GH2(110-819)                 |
| PAT3040_05352 | GH9(409-853)                 |
| PAT3040_05356 | PL12(403-494)                |
| PAT3040_05404 | CE1(20-151)                  |
| PAT3040_05405 | CBM48(143-232),GH13(305-648) |
| PAT3040_05407 | GH109(1-116)                 |
| PAT3040_05439 | GH2(3-477)                   |
| PAT3040_05441 | GH42(8-378)                  |
| PAT3040_05499 | AA3(5-566)                   |
| PAT3040_05520 | GH109(4-110)                 |
| PAT3040_05528 | GH130(6-346)                 |
| PAT3040_05548 | GH76(65-355),CBM35(388-509)  |
| PAT3040_05550 | GH76(34-326)                 |
| PAT3040_05570 | GH130(6-345)                 |
| PAT3040_05601 | GH109(3-114)                 |
| PAT3040_05655 | GH26(142-268)                |
| PAT3040_05659 | GH109(4-99)                  |
| PAT3040_05674 | CE9(4-383)                   |
| PAT3040_05699 | GH109(6-119)                 |
| PAT3040_05757 | GH109(5-116)                 |
| PAT3040_05761 | CE15(24-325)                 |
| PAT3040_05774 | CBM16(632-729),CBM6(715-841) |
| PAT3040_05788 | GH29(18-316)                 |
| PAT3040_05811 | GH109(4-115)                 |

|               |                                |
|---------------|--------------------------------|
| PAT3040_05812 | GH109(3-108)                   |
| PAT3040_05814 | GH38(2-215)                    |
| PAT3040_05821 | GH109(4-118)                   |
| PAT3040_05849 | CE7(29-335)                    |
| PAT3040_05866 | CE1(6-237),CE1(312-520)        |
| PAT3040_05888 | GH116(386-742)                 |
| PAT3040_05889 | CBM70(300-350)                 |
| PAT3040_05906 | GH2(16-578)                    |
| PAT3040_05907 | GH51(207-662)                  |
| PAT3040_05932 | GH109(31-93),CBM9(351-511)     |
| PAT3040_05933 | GH20(66-281)                   |
| PAT3040_05976 | GH109(5-121)                   |
| PAT3040_05979 | GH143(497-668)                 |
| PAT3040_05983 | CBM16(815-885),CBM16(916-1040) |
| PAT3040_06006 | CE1(14-266)                    |
| PAT3040_06008 | GH88(62-377)                   |
| PAT3040_06018 | GH105(391-715)                 |
| PAT3040_06024 | GH109(4-118)                   |
| PAT3040_06027 | GH109(3-104)                   |
| PAT3040_06031 | GH31(192-628)                  |
| PAT3040_06032 | GH109(50-111)                  |
| PAT3040_06037 | PL6(24-140)                    |
| PAT3040_06038 | GH88(46-367)                   |
| PAT3040_06043 | PL6(8-238)                     |
| PAT3040_06052 | GH51(2-507)                    |
| PAT3040_06083 | GH16(32-226)                   |
| PAT3040_06084 | GH42(185-302)                  |
| PAT3040_06090 | GH42(188-311)                  |
| PAT3040_06093 | GH42(458-592)                  |
| PAT3040_06102 | GH2(48-1017)                   |
| PAT3040_06110 | GT51(81-256)                   |

|               |                                                          |
|---------------|----------------------------------------------------------|
| PAT3040_06138 | CBM50(182-230)                                           |
| PAT3040_06156 | GH94(106-1097)                                           |
| PAT3040_06191 | CE4(81-204)                                              |
| PAT3040_06226 | GH109(4-121)                                             |
| PAT3040_06232 | GT2(8-166)                                               |
| PAT3040_06264 | GH3(64-286)                                              |
| PAT3040_06277 | CBM67(38-196),GH78(226-737)                              |
| PAT3040_06291 | CE3(135-202)                                             |
| PAT3040_06301 | GH42(19-391)                                             |
| PAT3040_06302 | CBM32(445-516)                                           |
| PAT3040_06308 | CE14(3-118)                                              |
| PAT3040_06383 | GT28(211-362)                                            |
| PAT3040_06391 | CBM67(15-176),GH78(211-691)                              |
| PAT3040_06394 | CBM16(114-223),GH39(425-714),CBM9(883-1078)              |
| PAT3040_06437 | CBM66(322-466),GH32(6-286)                               |
| PAT3040_06439 | GH31(176-604)                                            |
| PAT3040_06444 | CE7(4-316)                                               |
| PAT3040_06448 | CBM51(997-1077)                                          |
| PAT3040_06451 | GH109(5-119)                                             |
| PAT3040_06453 | GT4(197-353)                                             |
| PAT3040_06466 | CE1(11-194)                                              |
| PAT3040_06478 | GH18(327-560)                                            |
| PAT3040_06487 | GH109(2-133)                                             |
| PAT3040_06489 | CBM9(34-214)                                             |
| PAT3040_06501 | CBM54(196-300)                                           |
| PAT3040_06502 | GH2(29-692)                                              |
| PAT3040_06516 | CBM22(39-171),CBM22(209-334),GH10(369-694),CBM9(721-893) |
| PAT3040_06545 | GH42(15-131)                                             |
| PAT3040_06562 | GH2(8-739)                                               |
| PAT3040_06569 | GH42(20-390)                                             |
| PAT3040_06575 | GH106(11-728)                                            |

|               |                                                             |
|---------------|-------------------------------------------------------------|
| PAT3040_06580 | GH95(2-393)                                                 |
| PAT3040_06582 | GH105(34-375)                                               |
| PAT3040_06583 | PL22(34-274)                                                |
| PAT3040_06586 | GH105(4-140)                                                |
| PAT3040_06596 | GH109(2-116)                                                |
| PAT3040_06598 | GH106(7-817)                                                |
| PAT3040_06616 | CBM22(49-176),CBM22(235-354),CBM22(397-519)                 |
| PAT3040_06619 | CBM61(38-158),CBM16(171-305),GH53(374-733),CBM32(1812-1923) |
| PAT3040_06620 | GH115(28-462)                                               |
| PAT3040_06625 | CE6(87-166)                                                 |
| PAT3040_06669 | GH38(232-491)                                               |
| PAT3040_06703 | CBM9(115-275),CBM16(553-653),GH42(708-982)                  |
| PAT3040_06705 | GH78(302-568)                                               |
| PAT3040_06722 | AA6(3-93)                                                   |
| PAT3040_06746 | GH43(27-322),CBM66(358-486)                                 |
| PAT3040_06781 | GH18(308-594)                                               |
| PAT3040_06795 | GT2(5-128)                                                  |
| PAT3040_06796 | GT94(24-316)                                                |
| PAT3040_06798 | GT4(179-333)                                                |
| PAT3040_06799 | GT4(273-350)                                                |
| PAT3040_06801 | GT4(185-319)                                                |
| PAT3040_06820 | CBM50(4-46),CBM50(53-96)                                    |
| PAT3040_06858 | GT4(197-344)                                                |
| PAT3040_06859 | CE14(2-50)                                                  |
| PAT3040_06925 | CE4(91-214)                                                 |
| PAT3040_07024 | GH15(277-640)                                               |
| PAT3040_07025 | GT5(2-471)                                                  |
| PAT3040_07028 | CBM48(29-112),GH13(180-487)                                 |
| PAT3040_07030 | CE10(277-442)                                               |
| PAT3040_07151 | GT2(86-283),GT21(252-336)                                   |
| PAT3040_07152 | GT2(12-141)                                                 |

|               |                              |
|---------------|------------------------------|
| PAT3040_07199 | GH4(3-180)                   |
| PAT3040_07201 | GH51(3-497)                  |
| PAT3040_07202 | CE1(12-255)                  |
| PAT3040_07209 | GH109(29-117)                |
| PAT3040_07213 | GH3(150-372)                 |
| PAT3040_07225 | GH141(4-523)                 |
| PAT3040_07245 | GH43(6-316)                  |
| PAT3040_07248 | AA6(23-102)                  |
| PAT3040_07257 | AA7(20-179)                  |
| PAT3040_07258 | GH39(110-483),CBM61(717-857) |
| PAT3040_07265 | GH137(14-333)                |
| PAT3040_07275 | CE10(34-260)                 |
| PAT3040_07282 | GH94(2-668)                  |

---

GH, glycoside hydrolase family; GT, glycosyltransferase family; PL, polysaccharide lyase family; CE, carbohydrate esterase family; AA, auxiliary activities family; CBM, carbohydrate-binding module family

The genes of CITase (*cit*, PAT3040\_05188) and a putative 6- $\alpha$ -glucosyltransferase (*6gt31a*, PAT3040\_05195-05196) are shown in red color.
